# Supplementary material for: Construction of a Gravity Model of Tiktok Short-Video Traffic Driven by Endogenous Motivation
Source: Research Square preprint supplement (doi:10.21203/rs.3.rs-7391015/v1), 2025-09-04
Supplement: Supplementary file 2 [file 41c0d8d3db60849a3081febc.pdf]

### Summary table of model regression coefficients [Tian](#)

| X                             | Y                                                                                                                                     | Nonstandard regression coefficients | SE    | z (CR price) | p     | Standardized regression coefficient |
|-------------------------------|---------------------------------------------------------------------------------------------------------------------------------------|-------------------------------------|-------|--------------|-------|-------------------------------------|
| Demand hierarchy →            | personality characteristics                                                                                                           | 0.649                               | 0.079 | 8.256        | 0.000 | 0.929                               |
| Demand hierarchy →            | Useful                                                                                                                                | −0.301                              | 0.165 | −1.826       | 0.068 | −0.350                              |
| personality characteristics → | Useful                                                                                                                                | 1.621                               | 0.310 | 5.224        | 0.000 | 1.316                               |
| Demand hierarchy →            | 10.I use short videos to fulfill my need for self-actualization, such as creating and sharing my own work. (Self-actualization needs) | 0.962                               | 0.089 | 10.772       | 0.000 | 0.554                               |
| Demand hierarchy →            | 9.I use TikTok to find communities that share my interests. (Social needs)                                                            | 1.082                               | 0.094 | 11.532       | 0.000 | 0.604                               |
| Demand hierarchy →            | 8.I watch short videos to learn new skills to help solve practical problems. (Physiological needs)                                    | 1.034                               | 0.086 | 12.039       | 0.000 | 0.639                               |
| Demand hierarchy →            | 7.I follow personal growth related content on TikTok.(Self-actualization needs)                                                       | 0.994                               | 0.085 | 11.745       | 0.000 | 0.618                               |
| Demand hierarchy →            | 6.I watch short videos to meet basic physiological needs, such as looking for food making tutorials. (Physiological needs)            | 0.944                               | 0.088 | 10.706       | 0.000 | 0.550                               |
| Demand hierarchy →            | 5.I use short videos to satisfy my need for security, such as understanding news and current events. (Safety needs)                   | 0.977                               | 0.088 | 11.139       | 0.000 | 0.578                               |
| Demand hierarchy →            | 4.I often watch videos on TikTok related to health and safety guidelines. (Safety needs)                                              | 1.107                               | 0.091 | 12.115       | 0.000 | 0.644                               |
| Demand hierarchy →            | 3.I watch short videos to regain personal respect and recognition in the virtual world. (Respect requires)                            | 1.098                               | 0.098 | 11.226       | 0.000 | 0.584                               |
| Demand hierarchy →            | 2.I look for content on TikTok to motivate me to enhance my self-esteem and sense of self-worth. (Self-actualization needs)           | 1.166                               | 0.090 | 12.899       | 0.000 | 0.702                               |
| Demand hierarchy →            | 1.I use short videos to meet my social needs, such as participating in hot topic discussions. (Social needs)                          | 1.000                               |       |              |       | 0.605                               |
| personality characteristics → | 20.I use TikTok to balance my work and personal life. (Self)                                                                          | 1.453                               | 0.172 | 8.452        | 0.000 | 0.602                               |
| personality characteristics → | 19.I use short videos to seek emotional resonance and understanding with others. (Id)                                                 | 1.383                               | 0.166 | 8.355        | 0.000 | 0.585                               |
| personality characteristics → | 18.I follow videos on TikTok that can help me solve problems in real life. (Self)                                                     | 1.430                               | 0.168 | 8.511        | 0.000 | 0.612                               |
| personality characteristics → | 17.I watch short videos to satisfy my aesthetic needs and artistic appreciation. (Super self)                                         | 1.466                               | 0.171 | 8.585        | 0.000 | 0.626                               |
| personality characteristics → | 16.I use TikTok to find content that inspires my creativity. (Super-ego)                                                              | 1.472                               | 0.171 | 8.611        | 0.000 | 0.631                               |
| personality characteristics → | 15.I satisfy my curiosity and desire to explore by watching short videos. (This me)                                                   | 1.271                               | 0.155 | 8.226        | 0.000 | 0.564                               |
| personality characteristics → | 14.I follow content on TikTok that reflects my moral standards and values. (Superior Self)                                            | 1.259                               | 0.153 | 8.208        | 0.000 | 0.561                               |
| personality characteristics → | 13.I watch short videos to satisfy the ego's reality principle, such as learning practical information. (Self)                        | 1.371                               | 0.163 | 8.395        | 0.000 | 0.592                               |
| personality characteristics → | 12.I use short videos to explore and express my subconscious desires. (The id)                                                        | 1.398                               | 0.169 | 8.294        | 0.000 | 0.575                               |
| personality characteristics → | 11.I often watch funny or spoof videos on TikTok to release repressed emotions. (The id)                                              | 1.000                               |       |              |       | 0.406                               |
| Useful and satisfied →        | 30.I follow videos on TikTok that help me achieve my personal goals.                                                                  | 1.148                               | 0.113 | 10.159       | 0.000 | 0.592                               |
| Useful and satisfied →        | 21.I watch short videos for instant gratification.                                                                                    | 1.000                               |       |              | –     | 0.516                               |
| Useful and satisfied →        | 29.I watch short videos to satisfy my desire for novelty.                                                                             | 1.165                               | 0.112 | 10.353       | 0.000 | 0.611                               |
| Useful and satisfied →        | 28.I use TikTok to find content that improves the quality of my life.                                                                 | 1.212                               | 0.113 | 10.703       | 0.000 | 0.647                               |
| Useful and satisfied →        | 27.I watch short videos for the satisfaction of communicating and sharing with others.                                                | 1.237                               | 0.119 | 10.438       | 0.000 | 0.619                               |
| Useful →                      | 26.I follow content on TikTok that offers new perspectives and thinking.                                                              | 1.259                               | 0.118 | 10.679       | 0.000 | 0.644                               |
| Useful →                      | 25.I satisfy my thirst for knowledge and curiosity by watching short videos.                                                          | 1.240                               | 0.116 | 10.697       | 0.000 | 0.646                               |
| Useful and satisfied →        | 24.I use TikTok to find content that inspires my inner potential.                                                                     | 1.219                               | 0.115 | 10.559       | 0.000 | 0.632                               |
| Useful and satisfied →        | 23.I watch short videos to escape from the stress and problems in real life.                                                          | 1.028                               | 0.114 | 9.037        | 0.000 | 0.495                               |
| Useful and satisfied →        | 22.I use TikTok to find videos that satisfy my specific interests.                                                                    | 1.082                               | 0.108 | 10.004       | 0.000 | 0.578                               |

Note: → indicates a regression impact relationship or a measurement relationship

Horizontal bar 9-indicates that the item is a reference item

At present, the correlation between data is too strong, resulting in the regression coefficient  $>1$ , and the results may not be applicable. It is suggested to find the items with excessive correlation/weakness and remove them before reanalysis.

© Analytical recommendations by

The SEM regression relationship table includes two kinds of relationships, namely structural relationship and measurement relationship.

First: whether it is the influence structure relationship or the measurement relationship, the standardized path coefficient value is usually used to represent the relationship;

Second: if it is significant, it means that there is a significant influence/measurement relationship, otherwise it means that there is no influence/measurement relationship between the items;

Third: if more path coefficients do not show significance, it indicates that the model is poor, and it is suggested to reconfigure the model relationship or adjust the model;

Fourth: The first item of the measurement relationship is the control item, so no z or p values are output.

Model fitting index Tian

| Common indicators     | $\chi^2$ | df    | p     | The chi-square degrees of freedom ratio is $\chi^2/df$ | GFI   | RMSEA | RMR   | CFI         | NFI   | NNFI  |
|-----------------------|----------|-------|-------|--------------------------------------------------------|-------|-------|-------|-------------|-------|-------|
| criteria for judgment |          |       | >0.05 | <3                                                     | >0.9  | <0.10 | <0.05 | >0.9        | >0.9  | >0.9  |
| price                 | 859.376  | 402   | 0.000 | 2.138                                                  | 0.894 | 0.047 | 0.051 | 0.918       | 0.857 | 0.911 |
| Other indicators      | TLI      | AGFI  | IFI   | PGFI                                                   | PNFI  | PCFI  | SRMR  | RMSEA 90%CI |       |       |
| criteria for judgment | >0.9     | >0.9  | >0.9  | >0.5                                                   | >0.5  | >0.5  | <0.1  |             |       |       |
| price                 | 0.911    | 0.878 | 0.918 | 0.773                                                  | 0.792 | 0.848 | 0.042 | 0.042~0.051 |       |       |

**Note: When the default model is  $\chi^2(435) = 6002.828$ ,  $p = 1.000$**

© Analytical recommendations by

Model fitting index is used to analyze the validity of the overall model fitting;

First: there are many model fitting indicators, and it is usually difficult to meet all the indicators;

Second: it is suggested to use several common indicators, including chi-square degrees of freedom ratio, GFI, RMSEA, RMR, CFI, NFI, and NNFI;

Third: Default Model refers to the initial value estimation index of the fitting model, which usually has little significance.

### Summary table of model fit R2

| Item                                                                                                                                    | R square value |
|-----------------------------------------------------------------------------------------------------------------------------------------|----------------|
| personality characteristics                                                                                                             | 0.863          |
| Useful                                                                                                                                  | 1.000          |
| 30.I follow videos on TikTok that help me achieve my personal goals.                                                                    | 0.351          |
| 21.I watch short videos for instant gratification.                                                                                      | 0.266          |
| 20.I use TikTok to balance my work and personal life. (Self)                                                                            | 0.362          |
| 19.I use short videos to seek emotional resonance and understanding with others. (Id)                                                   | 0.342          |
| 18.I follow videos on TikTok that can help me solve problems in real life. (Self)                                                       | 0.375          |
| 17.I watch short videos to satisfy my aesthetic needs and artistic appreciation. (Super self)                                           | 0.392          |
| 16.I use TikTok to find content that inspires my creativity. (Super-ego)                                                                | 0.398          |
| 15.I satisfy my curiosity and desire to explore by watching short videos. (This me)                                                     | 0.318          |
| 14.I follow content on TikTok that reflects my moral standards and values. (Superior Self)                                              | 0.315          |
| 13.I watch short videos to satisfy the ego's reality principle, such as learning practical information. (Self)                          | 0.350          |
| 12.I use short videos to explore and express my subconscious desires. (The id)                                                          | 0.331          |
| 29.I watch short videos to satisfy my desire for novelty.                                                                               | 0.373          |
| 11.I often watch funny or spoof videos on TikTok to release repressed emotions. (The id)                                                | 0.165          |
| 10.I use short videos to fulfill my need for self-actualization, such as creating and sharing personal work. (Self-actualization needs) | 0.307          |
| 9.I use TikTok to find communities that are interested in me. (Social needs)                                                            | 0.365          |
| 8.I watch short videos to learn new skills to help solve practical problems. (Physiological needs)                                      | 0.408          |
| 7.I follow personal growth related content on TikTok.(Self-actualization needs)                                                         | 0.382          |
| 6.I watch short videos to meet basic physiological needs, such as looking for food making tutorials. (Physiological needs)              | 0.302          |
| 5.I use short videos to satisfy my need for security, such as understanding news and current events. (Safety needs)                     | 0.334          |
| 4.I often watch videos on TikTok related to health and safety guidelines. (Safety needs)                                                | 0.415          |
| 3.I watch short videos to regain personal respect and recognition in the virtual world. (Respect requires)                              | 0.340          |
| 2.I look for content on TikTok to motivate me to enhance my self-esteem and sense of self-worth. (Self-actualization needs)             | 0.492          |
| 28.I use TikTok to find content that improves the quality of my life.                                                                   | 0.418          |
| 1.I use short videos to meet my social needs, such as participating in hot topic discussions. (Social needs)                            | 0.365          |
| 27.I watch short videos for the satisfaction of communicating and sharing with others.                                                  | 0.384          |
| 26.I follow content on TikTok that offers new perspectives and thinking.                                                                | 0.415          |
| 25.I satisfy my thirst for knowledge and curiosity by watching short videos.                                                            | 0.417          |
| 24.I use TikTok to find content that inspires my inner potential.                                                                       | 0.399          |
| 23.I watch short videos to escape from the stress and problems in real life.                                                            | 0.245          |
| 22.I use TikTok to find videos that satisfy my specific interests.                                                                      | 0.334          |

0 Analytical recommendations [by](#)

The summary table of model fit R square shows the R square value of the fitting index;

First: an affected item (dependent variable) will correspond to an R square value, if there are multiple affected items, there will be multiple R square values;

Second: if the purpose of the study is to look at the relationship between influences, the significance of the R square value is small.

The covariance table is [by](#)

| X Y | Nonstandard estimated coefficients (Coef.) | Standard error (Std.Error) | <i>z p</i> | Standard estimate coefficient (Std.Estimate) |
|-----|--------------------------------------------|----------------------------|------------|----------------------------------------------|
|-----|--------------------------------------------|----------------------------|------------|----------------------------------------------|

0 Analytical recommendations [back](#)

The covariance relationship between the display items (i.e., correlation);

First: the covariance relationship table shows the covariance relationship between items;

Second: SPSSAU will automatically establish the covariance relationship between exogenous variables and present the results in the current table (covariance relationship table).

| Item                                                                                                                      | Number | Residual term estimates | Nonstandard estimated coefficient (Coef.) | Standard error (Std.Error) | <i>z p</i>  | Standard estimated coefficient (Std.Estimate) |
|---------------------------------------------------------------------------------------------------------------------------|--------|-------------------------|-------------------------------------------|----------------------------|-------------|-----------------------------------------------|
| Demand level                                                                                                              | e1     |                         | 0.427                                     | 0.059                      | 7.2910.000  | 1.000                                         |
| personality characteristics                                                                                               | e2     |                         | 0.029                                     | 0.008                      | 3.3920.001  | 0.137                                         |
| Useful                                                                                                                    | e3     |                         | 0.000                                     | 0.011                      | 0.0001.000  | 0.000                                         |
| 30.I follow videos on TikTok that help me achieve my personal goals.                                                      | e4     |                         | 0.770                                     | 0.050                      | 15.3490.000 | 0.649                                         |
| 21.I watch short videos for instant gratification.                                                                        | e5     |                         | 0.869                                     | 0.056                      | 15.6120.000 | 0.734                                         |
| 20.I use TikTok to balance my work and personal life. (Self)                                                              | e6     |                         | 0.774                                     | 0.050                      | 15.4870.000 | 0.638                                         |
| 19.I use short videos to seek emotional resonance and understanding with others. (Id)                                     | e7     |                         | 0.765                                     | 0.049                      | 15.5450.000 | 0.658                                         |
| 18.I follow videos on TikTok that can help me solve problems in real life. (Self)                                         | e8     |                         | 0.709                                     | 0.046                      | 15.4470.000 | 0.625                                         |
| 17.I watch short videos to satisfy my aesthetic needs and artistic appreciation. (Super self)                             | e9     |                         | 0.694                                     | 0.045                      | 15.3910.000 | 0.608                                         |
| 16.I use TikTok to find content that inspires my creativity. (Super-ego)                                                  | e10    |                         | 0.682                                     | 0.044                      | 15.3700.000 | 0.602                                         |
| 15.I satisfy my curiosity and desire to explore by watching short videos. (This me)                                       | e11    |                         | 0.721                                     | 0.046                      | 15.6100.000 | 0.682                                         |
| 14.I follow content on TikTok that reflects my moral standards and values. (Superior Self)                                | e12    |                         | 0.717                                     | 0.046                      | 15.6180.000 | 0.685                                         |
| 13.I watch short videos to satisfy the reality principle of self (Eao). For example, I learn practical information (self) | e13    |                         | 0.726                                     | 0.047                      | 15.5220.000 | 0.650                                         |

|                                                                                                                                         |     |        |        |               |        |
|-----------------------------------------------------------------------------------------------------------------------------------------|-----|--------|--------|---------------|--------|
| 12.I use short videos to explore and express my subconscious desires. (The id)                                                          | e14 | 0. 824 | 0. 053 | 15. 5780. 000 | 0. 669 |
| 29.I watch short videos to satisfy my desire for novelty.                                                                               | e15 | 0. 719 | 0. 047 | 15. 2660. 000 | 0. 627 |
| 11.I often watch funny or spoof videos on TikTok to release repressed emotions. (The id)                                                | e16 | 1. 054 | 0. 066 | 15. 9230. 000 | 0. 835 |
| 10.I use short videos to fulfill my need for self-actualization, such as creating and sharing personal work. (Self-actualization needs) | e17 | 0. 892 | 0. 058 | 15. 3460. 000 | 0. 693 |
| 9.I use TikTok to find communities that share my interests. (Social needs)                                                              | e18 | 0. 870 | 0. 058 | 15. 1080. 000 | 0. 635 |
| 8.I watch short videos to learn new skills to help solve practical problems. (Physiological needs)                                      | e19 | 0. 661 | 0. 044 | 14. 8980. 000 | 0. 592 |
| 7.I follow personal growth related content on TikTok.(Self-actualization needs)                                                         | e20 | 0. 680 | 0. 045 | 15. 0260. 000 | 0. 618 |
| 6.I watch short videos to meet basic physiological needs, such as looking for food making tutorials. (Physiological needs)              | e21 | 0. 878 | 0. 057 | 15. 3630. 000 | 0. 698 |
| 5.I use short videos to satisfy my need for security, such as understanding news and current events. (Safety needs)                     | e22 | 0. 813 | 0. 053 | 15. 2400. 000 | 0. 666 |
| 4.I often watch videos on TikTok related to health and safety guidelines. (Safety needs)                                                | e23 | 0. 736 | 0. 050 | 14. 8610. 000 | 0. 585 |
| 3.I watch short videos to regain personal respect and recognition in the virtual world. (Respect requires)                              | e24 | 0. 996 | 0. 065 | 15. 2130. 000 | 0. 660 |
| 2.I look for content on TikTok to motivate me to enhance my self-esteem and sense of self-worth. (Self-actualization needs)             | e25 | 0. 598 | 0. 042 | 14. 3830. 000 | 0. 508 |
| 28.I use TikTok to find content that improves the quality of my life.                                                                   | e26 | 0. 645 | 0. 043 | 15. 0790. 000 | 0. 582 |
| 1.I use short videos to meet my social needs, such as participating in hot topic discussions. (Social needs)                            | e27 | 0. 741 | 0. 049 | 15. 1040. 000 | 0. 635 |
| 27.I watch short videos for the satisfaction of communicating and sharing with others.                                                  | e28 | 0. 776 | 0. 051 | 15. 2250. 000 | 0. 616 |
| 26.I follow content on TikTok that offers new perspectives and thinking.                                                                | e29 | 0. 706 | 0. 047 | 15. 0940. 000 | 0. 585 |
| 25.I satisfy my thirst for knowledge and curiosity by watching short videos.                                                            | e30 | 0. 678 | 0. 045 | 15. 0830. 000 | 0. 583 |
| 24.I use TikTok to find content that inspires my inner potential.                                                                       | e31 | 0. 707 | 0. 047 | 15. 1630. 000 | 0. 601 |
| 23.I watch short videos to escape from the stress and problems in real life.                                                            | e32 | 1. 026 | 0. 065 | 15. 6680. 000 | 0. 755 |
| 22.I use TikTok to find videos that satisfy my specific interests.                                                                      | e33 | 0. 738 | 0. 048 | 15. 4080. 000 | 0. 666 |

### © Analytical recommendations by

The table above shows the estimated residual terms of each item after model fitting;

First: the smaller the standard estimated coefficient value corresponding to the general residual, the better;

Second: the residual term estimate has relatively small significance and is usually of no practical significance and can be ignored directly.

Illustration of Model

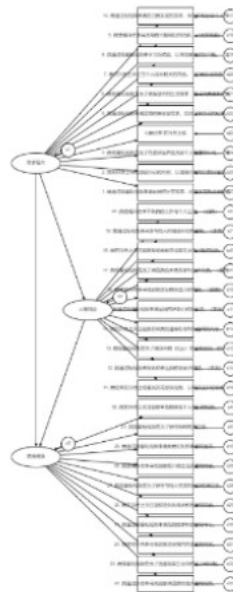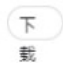

☒ Residual display ☒ Show covariance

Model Results Figure

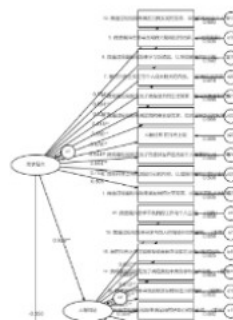

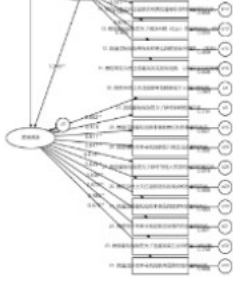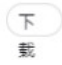

Residuals shown with \* signs show covariance

Summary of sample missing status [by](#)

| Item                   | sample number | proportion |
|------------------------|---------------|------------|
| Valid samples          | 521           | 100. 0%    |
| Remove invalid samples | 0             | 0. 0%      |
| amount to              | 521           | 100%       |

## 0 Analytical Recommendations [by](#)

The table above shows the effective samples and invalid samples excluded from the algorithm model.

- First: the valid sample in the above table refers to the total number of samples with data for all analysis items, and the invalid sample refers to the total number of samples with missing any analysis item;
- Second: If there is missing data in any analysis item of a sample (that is, invalid samples are excluded), such samples cannot be included in the model analysis, and the model can only be analyzed for valid samples;
- Third: The sample situation of each analysis item can be analyzed and checked through the description in the general method, or the specific data can be viewed in the upper right corner.

## References [by](#)

- 【1】 The SPSSAU project(2025).SPSSAU.(Version 25.0)[Online Application Software].Retrieved from <https://www.spssau.com>.
- 【2】 Zhou Jun and Ma Shipeng. SPSSAU: Research Data Analysis Methods and Applications. 1st Edition [M]. Electronic Industry Press, 2024.
