# Supplementary material for: Construction of a Gravity Model of Tiktok Short-Video Traffic Driven by Endogenous Motivation
Source: Research Square preprint supplement (doi:10.21203/rs.3.rs-7391015/v1), 2025-09-04
Supplement: Supplementary file 3 [file 49f5dd78b7e6a7f28b3daec9.pdf]

## TikTok Questionnaire on Driving Factors of Short Video Users' Video Viewing Behavior

essential information

1. Your gender: [Single Choice]

| Option                      | Subtotal | Percentage |
|-----------------------------|----------|------------|
| male                        | 229      | 42.88%     |
| woman                       | 305      | 57.12%     |
| Valid Count Per Participant | 534      |            |

2. Your age: [Single Choice]

| Option                      | Subtotal | Percentage |
|-----------------------------|----------|------------|
| Under 18                    | 0        | 0%         |
| 18-24 years old             | 176      | 32.96%     |
| 25-34 years old             | 230      | 43.07%     |
| 35-44 years old             | 103      | 19.29%     |
| 45 and over                 | 25       | 4.68%      |
| Valid Count Per Participant | 534      |            |

3. Your occupation: [Single Choice]

| Option                      | Subtotal | Percentage |
|-----------------------------|----------|------------|
| student                     | 111      | 20.79%     |
| office worker               | 290      | 54.31%     |
| professional                | 105      | 19.66%     |
| Housewife/husband           | 23       | 4.31%      |
| retire                      | 2        | 0.37%      |
| other                       | 3        | 0.56%      |
| Valid Count Per Participant | 534      |            |

4. How much time do you spend on TikTok every day? [Single Choice]

| Option                | Subtotal | Percentage |
|-----------------------|----------|------------|
| Less than 30 minutes  | 41       | 7.68%      |
| 30 minutes to an hour | 152      | 28.46%     |
| 1-2 hours             | 199      | 37.27%     |
| 2-3 hours             | 94       | 17.6%      |
| More than three hours | 48       | 8.99%      |

| Option                      | Subtotal | Percentage |
|-----------------------------|----------|------------|
| Valid Count Per Participant | 534      |            |

5. What is the main purpose of watching short videos? [Multiple Choice]

| Option                      | Subtotal | Percentage |
|-----------------------------|----------|------------|
| Relax                       | 365      | 68.35%     |
| Learn new things            | 296      | 55.43%     |
| Social interaction          | 285      | 53.37%     |
| Follow the trend            | 189      | 35.39%     |
| other                       | 21       | 3.93%      |
| Valid Count Per Participant | 534      |            |

Core measures. Please rate the following questions on a five-point Likert scale, with 1 indicating "strongly disagree" and 5 indicating "strongly agree", according to your actual situation.

1. Need hierarchy dimension

1. I watch short videos to meet my social needs, such as participating in the discussion of hot topics. (Social needs) [Single Choice]

| Option                      | Subtotal | Percentage |
|-----------------------------|----------|------------|
| 1                           | 37       | 6.93%      |
| 2                           | 97       | 18.16%     |
| 3                           | 167      | 31.27%     |
| 4                           | 175      | 32.77%     |
| 5                           | 58       | 10.86%     |
| Valid Count Per Participant | 534      |            |

2. I look for content to motivate me on TikTok to enhance my self-esteem and sense of self-worth. (Self-actualization needs) [Single Choice]

| Option                      | Subtotal | Percentage |
|-----------------------------|----------|------------|
| 1                           | 35       | 6.55%      |
| 2                           | 86       | 16.1%      |
| 3                           | 182      | 34.08%     |
| 4                           | 159      | 29.78%     |
| 5                           | 72       | 13.48%     |
| Valid Count Per Participant | 534      |            |

3. I watch short videos in order to regain personal respect and recognition in the virtual world. (Respect needs) [Single Choice]

| Option                             | Subtotal   | Percentage |
|------------------------------------|------------|------------|
| 1                                  | 70         | 13.11%     |
| 2                                  | 110        | 20.6%      |
| 3                                  | 156        | 29.21%     |
| 4                                  | 124        | 23.22%     |
| 5                                  | 74         | 13.86%     |
| <b>Valid Count Per Participant</b> | <b>534</b> |            |

4. I often watch videos on TikTok related to health and safety guidelines. (Safety needs) [Single Choice]

| Option                             | Subtotal   | Percentage |
|------------------------------------|------------|------------|
| 1                                  | 41         | 7.68%      |
| 2                                  | 72         | 13.48%     |
| 3                                  | 157        | 29.4%      |
| 4                                  | 182        | 34.08%     |
| 5                                  | 82         | 15.36%     |
| <b>Valid Count Per Participant</b> | <b>534</b> |            |

5. I use short videos to satisfy my need for security, such as understanding news and current events. (Safety needs) [Single Choice]

| Option                             | Subtotal   | Percentage |
|------------------------------------|------------|------------|
| 1                                  | 31         | 5.81%      |
| 2                                  | 59         | 11.05%     |
| 3                                  | 158        | 29.59%     |
| 4                                  | 177        | 33.15%     |
| 5                                  | 109        | 20.41%     |
| <b>Valid Count Per Participant</b> | <b>534</b> |            |

6. I watch short videos to meet basic physiological needs, such as looking for food making tutorials. (Physiological needs) [Single Choice]

| Option                             | Subtotal   | Percentage |
|------------------------------------|------------|------------|
| 1                                  | 38         | 7.12%      |
| 2                                  | 79         | 14.79%     |
| 3                                  | 153        | 28.65%     |
| 4                                  | 181        | 33.9%      |
| 5                                  | 83         | 15.54%     |
| <b>Valid Count Per Participant</b> | <b>534</b> |            |

7. I follow personal growth related content on TikTok. (Self-actualization needs) [Single Choice]

| Option                      | Subtotal | Percentage |
|-----------------------------|----------|------------|
| 1                           | 25       | 4.68%      |
| 2                           | 60       | 11.24%     |
| 3                           | 180      | 33.71%     |
| 4                           | 174      | 32.58%     |
| 5                           | 95       | 17.79%     |
| Valid Count Per Participant | 534      |            |

8.I watch short videos to learn new skills to help solve practical problems. (Physiological needs) [Single Choice]

| Option                      | Subtotal | Percentage |
|-----------------------------|----------|------------|
| 1                           | 22       | 4.12%      |
| 2                           | 70       | 13.11%     |
| 3                           | 161      | 30.15%     |
| 4                           | 183      | 34.27%     |
| 5                           | 98       | 18.35%     |
| Valid Count Per Participant | 534      |            |

9. I use TikTok to find communities that match my interests. (Social needs) [Single Choice]

| Option                      | Subtotal | Percentage |
|-----------------------------|----------|------------|
| 1                           | 42       | 7.87%      |
| 2                           | 65       | 12.17%     |
| 3                           | 159      | 29.78%     |
| 4                           | 158      | 29.59%     |
| 5                           | 110      | 20.6%      |
| Valid Count Per Participant | 534      |            |

10. I use short videos to satisfy my need for self-actualization, such as creating and sharing personal works. (Self-actualization needs) [Single Choice]

| Option                      | Subtotal | Percentage |
|-----------------------------|----------|------------|
| 1                           | 39       | 7.3%       |
| 2                           | 72       | 13.48%     |
| 3                           | 154      | 28.84%     |
| 4                           | 177      | 33.15%     |
| 5                           | 92       | 17.23%     |
| Valid Count Per Participant | 534      |            |

11. I often watch funny or spoof videos on TikTok to release repressed emotions. (Id) [Single Choice]

| Option                      | Subtotal | Percentage                   |
|-----------------------------|----------|------------------------------|
| 1                           | 26       | <div><div></div>4. 87%</div> |
| 2                           | 72       | 13. 48%                      |
| 3                           | 145      | 27. 15%                      |
| 4                           | 170      | 31. 84%                      |
| 5                           | 121      | 22. 66%                      |
| Valid Count Per Participant | 534      |                              |

12. I explore and express my subconscious desires through short videos. (Id) [Single Choice]

| Option                      | Subtotal | Percentage |
|-----------------------------|----------|------------|
| 1                           | 29       | 5. 43%     |
| 2                           | 78       | 14. 61%    |
| 3                           | 146      | 27. 34%    |
| 4                           | 182      | 34. 08%    |
| 5                           | 99       | 18. 54%    |
| Valid Count Per Participant | 534      |            |

13. I watch short videos to satisfy the ego's reality principle, such as learning practical information. (Self) [Single Choice]

| Option                      | Subtotal | Percentage |
|-----------------------------|----------|------------|
| 1                           | 25       | 4. 68%     |
| 2                           | 66       | 12. 36%    |
| 3                           | 157      | 29. 4%     |
| 4                           | 193      | 36. 14%    |
| 5                           | 93       | 17. 42%    |
| Valid Count Per Participant | 534      |            |

14. I follow content on TikTok that reflects my moral standards and values. (Super-ego) [Single Choice]

| Option                      | Subtotal | Percentage |
|-----------------------------|----------|------------|
| 1                           | 17       | 3. 18%     |
| 2                           | 68       | 12. 73%    |
| 3                           | 156      | 29. 21%    |
| 4                           | 196      | 36. 7%     |
| 5                           | 97       | 18. 16%    |
| Valid Count Per Participant | 534      |            |

15. I satisfy my curiosity and desire to explore by watching short videos. (This me) [Single Choice]

| Option                             | Subtotal   | Percentage |
|------------------------------------|------------|------------|
| 1                                  | 17         | 3.18%      |
| 2                                  | 53         | 9.93%      |
| 3                                  | 126        | 23.6%      |
| 4                                  | 212        | 39.7%      |
| 5                                  | 126        | 23.6%      |
| <b>Valid Count Per Participant</b> | <b>534</b> |            |

16. I use TikTok to find content that can spark my creativity. (Super-ego) [Single Choice]

| Option                             | Subtotal   | Percentage |
|------------------------------------|------------|------------|
| 1                                  | 24         | 4.49%      |
| 2                                  | 72         | 13.48%     |
| 3                                  | 178        | 33.33%     |
| 4                                  | 165        | 30.9%      |
| 5                                  | 95         | 17.79%     |
| <b>Valid Count Per Participant</b> | <b>534</b> |            |

17. I watch short videos to satisfy my aesthetic needs and art appreciation. (Super-ego ) [Single Choice]

| Option                             | Subtotal   | Percentage |
|------------------------------------|------------|------------|
| 1                                  | 19         | 3.56%      |
| 2                                  | 76         | 14.23%     |
| 3                                  | 139        | 26.03%     |
| 4                                  | 192        | 35.96%     |
| 5                                  | 108        | 20.22%     |
| <b>Valid Count Per Participant</b> | <b>534</b> |            |

18. I follow videos on TikTok that can help me solve problems in real life. (Self) [Single Choice]

| Option                             | Subtotal   | Percentage |
|------------------------------------|------------|------------|
| 1                                  | 24         | 4.49%      |
| 2                                  | 55         | 10.3%      |
| 3                                  | 160        | 29.96%     |
| 4                                  | 182        | 34.08%     |
| 5                                  | 113        | 21.16%     |
| <b>Valid Count Per Participant</b> | <b>534</b> |            |

19.I use short videos to seek emotional resonance and understanding with others. (Id) [Single Choice]

| Option                      | Subtotal | Percentage |
|-----------------------------|----------|------------|
| 1                           | 24       | 4.49%      |
| 2                           | 73       | 13.67%     |
| 3                           | 156      | 29.21%     |
| 4                           | 180      | 33.71%     |
| 5                           | 101      | 18.91%     |
| Valid Count Per Participant | 534      |            |

20.I use TikTok to balance my work and personal life. (Self) [Single Choice]

| Option                      | Subtotal | Percentage |
|-----------------------------|----------|------------|
| 1                           | 34       | 6.37%      |
| 2                           | 63       | 11.8%      |
| 3                           | 140      | 26.22%     |
| 4                           | 203      | 38.01%     |
| 5                           | 94       | 17.6%      |
| Valid Count Per Participant | 534      |            |

III. Satisfaction and demand dimension

21.I watch short videos for instant gratification. [Single Choice]

| Option                      | Subtotal | Percentage |
|-----------------------------|----------|------------|
| 1                           | 26       | 4.87%      |
| 2                           | 51       | 9.55%      |
| 3                           | 154      | 28.84%     |
| 4                           | 177      | 33.15%     |
| 5                           | 126      | 23.6%      |
| Valid Count Per Participant | 534      |            |

22.I use TikTok to find videos that satisfy my specific interests. [Single Choice]

| Option | Subtotal | Percentage |
|--------|----------|------------|
| 1      | 20       | 3.75%      |
| 2      | 52       | 9.74%      |
| 3      | 128      | 23.97%     |
| 4      | 204      | 38.2%      |
| 5      | 130      | 24.34%     |

| Option                      | Subtotal | Percentage |
|-----------------------------|----------|------------|
| Valid Count Per Participant | 534      |            |

23. I Watch Short Videos in Order to Escape from the Stress and Problems in Real Life. [Single Choice]

| Option                      | Subtotal | Percentage |
|-----------------------------|----------|------------|
| 1                           | 39       | 7. 3%      |
| 2                           | 76       | 14. 23%    |
| 3                           | 135      | 25. 28%    |
| 4                           | 179      | 33. 52%    |
| 5                           | 105      | 19. 66%    |
| Valid Count Per Participant | 534      |            |

24. I use TikTok to find content that inspires my inner potential. [Single Choice]

| Option                      | Subtotal | Percentage |
|-----------------------------|----------|------------|
| 1                           | 28       | 5. 24%     |
| 2                           | 71       | 13. 3%     |
| 3                           | 166      | 31. 09%    |
| 4                           | 174      | 32. 58%    |
| 5                           | 95       | 17. 79%    |
| Valid Count Per Participant | 534      |            |

25. I Satisfy My Thirst for Knowledge and Curiosity by Watching Short Videos. [Single Choice]

| Option                      | Subtotal | Percentage |
|-----------------------------|----------|------------|
| 1                           | 24       | 4. 49%     |
| 2                           | 56       | 10. 49%    |
| 3                           | 141      | 26. 4%     |
| 4                           | 191      | 35. 77%    |
| 5                           | 122      | 22. 85%    |
| Valid Count Per Participant | 534      |            |

26.I follow content on TikTok that offers new perspectives and thinking. [Single Choice]

| Option | Subtotal | Percentage                    |
|--------|----------|-------------------------------|
| 1      | 27       | <div><div></div></div> 5. 06% |
| 2      | 61       | 11. 42%                       |
| 3      | 136      | 25. 47%                       |
| 4      | 193      | 36. 14%                       |



| Option                      | Subtotal | Percentage                    |
|-----------------------------|----------|-------------------------------|
| 5                           | 117      | <div><div></div></div> 21.91% |
| Valid Count Per Participant | 534      |                               |

27.I watch short videos in order to get the satisfaction of communicating and sharing with others. [Single Choice]

| Option                      | Subtotal | Percentage |
|-----------------------------|----------|------------|
| 1                           | 31       | 5.81%      |
| 2                           | 70       | 13.11%     |
| 3                           | 143      | 26.78%     |
| 4                           | 182      | 34.08%     |
| 5                           | 108      | 20.22%     |
| Valid Count Per Participant | 534      |            |

28.I Use TikTok to Find Content That Can Improve My Quality of Life. [Single Choice]

| Option                      | Subtotal | Percentage |
|-----------------------------|----------|------------|
| 1                           | 21       | 3.93%      |
| 2                           | 64       | 11.99%     |
| 3                           | 162      | 30.34%     |
| 4                           | 182      | 34.08%     |
| 5                           | 105      | 19.66%     |
| Valid Count Per Participant | 534      |            |

29.I satisfy my pursuit of novelty by watching short videos. [Single Choice]

| Option                      | Subtotal | Percentage |
|-----------------------------|----------|------------|
| 1                           | 20       | 3.75%      |
| 2                           | 57       | 10.67%     |
| 3                           | 129      | 24.16%     |
| 4                           | 194      | 36.33%     |
| 5                           | 134      | 25.09%     |
| Valid Count Per Participant | 534      |            |

30.I follow videos on TikTok that can help me achieve my personal goals. [Single Choice]

| Option | Subtotal | Percentage                   |
|--------|----------|------------------------------|
| 1      | 26       | <div><div></div></div> 4.87% |
| 2      | 72       | 13.48%                       |
| 3      | 157      | 29.4%                        |

| Option                      | Subtotal | Percentage |
|-----------------------------|----------|------------|
| 4                           | 177      | 33.15%     |
| 5                           | 102      | 19.1%      |
| Valid Count Per Participant | 534      |            |

\*\* tag : \*\*

Thank you for your participation in this survey! Your opinion is very important to our research. Please submit the questionnaire, we will ensure that your information is confidential. Thank you again for your valuable time and support!
