# Supplementary material for: Construction of a Gravity Model of Tiktok Short-Video Traffic Driven by Endogenous Motivation
Source: Research Square preprint supplement (doi:10.21203/rs.3.rs-7391015/v1), 2025-09-04
Supplement: Supplementary file 5 [file c2692eeb1e04840463edf74e.pdf]

| name                                              | option                     | frequency ② | percentage (%) ② | Cumulative percentage (%)② |
|---------------------------------------------------|----------------------------|-------------|------------------|----------------------------|
| 1. Your gender:                                   | ma<br>n                    | 224         | 42.99            | 42.99                      |
|                                                   | wo<br>man                  | 297         | 57.01            | 100.00                     |
|                                                   | 18-24 years old            | 169         | 32.44            | 32.44                      |
|                                                   | 25-34 years old            | 227         | 43.57            | 76.01                      |
|                                                   | 35-44 years old            | 100         | 19.19            | 95.20                      |
| 2. Your age:                                      | 45 and over                | 25          | 4.80             | 100.00                     |
|                                                   | student                    | 105         | 20.15            | 20.15                      |
|                                                   | office wor-<br>ker         | 284         | 54.51            | 74.66                      |
|                                                   | professional               | 104         | 19.96            | 94.63                      |
|                                                   | Housewife/husband          | 23          | 4.41             | 99.04                      |
| 3. Your occupation:                               | retire                     | 2           | 0.38             | 99.42                      |
|                                                   | other                      | 3           | 0.58             | 100.00                     |
|                                                   | Less than 30 minutes       | 38          | 7.29             | 7.29                       |
|                                                   | 30 minutes to an hour      | 149         | 28.60            | 35.89                      |
|                                                   | 1-2 hours                  | 194         | 37.24            | 73.13                      |
| 4.How much time do you spend on TikTok every day? | 2-3 hours                  | 92          | 17.66            | 90.79                      |
|                                                   | More than three ho-<br>urs | 48          | 9.21             | 100.00                     |
|                                                   | unselected                 | 166         | 31.86            | 31.86                      |
|                                                   | pitch on                   | 355         | 68.14            | 100.00                     |
|                                                   | unselected                 | 232         | 44.53            | 44.53                      |
| Relax                                             | pitch on                   | 289         | 55.47            | 100.00                     |
|                                                   | unselected                 | 239         | 45.87            | 45.87                      |
|                                                   | pitch on                   | 282         | 54.13            | 100.00                     |
|                                                   | unselected                 | 335         | 64.30            | 64.30                      |
|                                                   | pitch on                   | 186         | 35.70            | 100.00                     |
| Learn new things                                  | unselected                 | 502         | 96.35            | 96.35                      |
|                                                   | pitch on                   | 19          | 3.65             | 100.00                     |
|                                                   | unselected                 | 521         | 100.0            | 100.0                      |
|                                                   | pitch on                   |             |                  |                            |
|                                                   | amount to                  |             |                  |                            |

0 Analytical Recommendations [by](#)

Frequency analysis is used to study the distribution of categorical data, and how many frequencies and percentages are selected;

First: first describe the basic situation of research data;

Second: analyze each analysis item one by one, and focus on analyzing the options with more choices;

Third: summarize the analysis.

Intelligent analysis of [curves](#)

The table reveals the following key demographics: 1. Gender distribution shows over 50% female participants (42.99%) and 42.99% male participants. 2. Age distribution indicates 43.57% of respondents are aged 25-34, while 32.44% are 18-24 years old. 3. 54.51% of participants work in office environments. 4. Daily TikTok usage patterns show 30%+ users spend 1-2 hours daily (68.14% selected), with 31.86% not using it. 5. Learning new skills is preferred by 50%+ participants (68.14%), while 44.53% choose not to. 6. Social interactions are chosen by 54.13% (282.0 users), while 45.87% opt out. 7. Trend-chasing preferences show 64.30% not participating versus 35.70% choosing to follow trends. 8. Other activities remain inactive for 96.35% of participants.

| 1. Your gender: <a href="#">field</a> |           |            |                         |
|---------------------------------------|-----------|------------|-------------------------|
| Item                                  | frequency | percentage | accumulative perception |
| ma<br>n                               | 224       | 42.99%     | 42.99%                  |
| wo<br>man                             | 297       | 57.01%     | 100.00%                 |
| amount<br>to                          | 521       | 100.0%     |                         |

|         |        |  |           |  |           |  |
|---------|--------|--|-----------|--|-----------|--|
| ① Cakes | C ring |  | Pyramidal |  | Giant bar |  |
|---------|--------|--|-----------|--|-----------|--|

1. Your Gender:

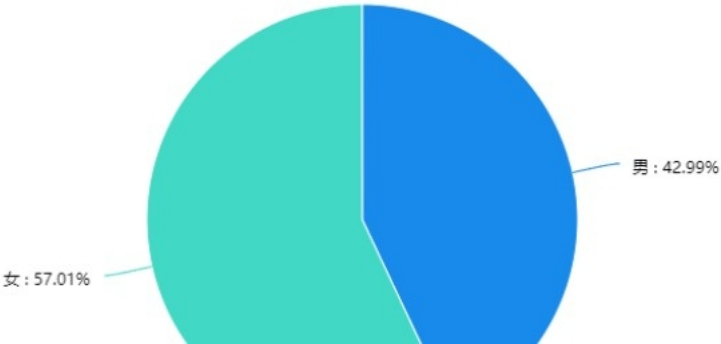

Repeal

D. Description Dimensions: Three styles

2. Your age: cause

| Item            | frequency | percentage | accumulative perception |
|-----------------|-----------|------------|-------------------------|
| 18-24 years old | 169       | 32. 44%    | 32. 44%                 |
| 25-34 years old | 227       | 43. 57%    | 76. 01%                 |
| 35-44 years old | 100       | 19. 19%    | 95. 20%                 |
| 45 and over     | 25        | 4. 80%     | 100. 00%                |
| amount to       | 521       | 100. 0%    |                         |

|         |        |           |  |           |  |
|---------|--------|-----------|--|-----------|--|
| ① Cakes | C ring | Pyramidal |  | Giant bar |  |
|---------|--------|-----------|--|-----------|--|

2. Your age:

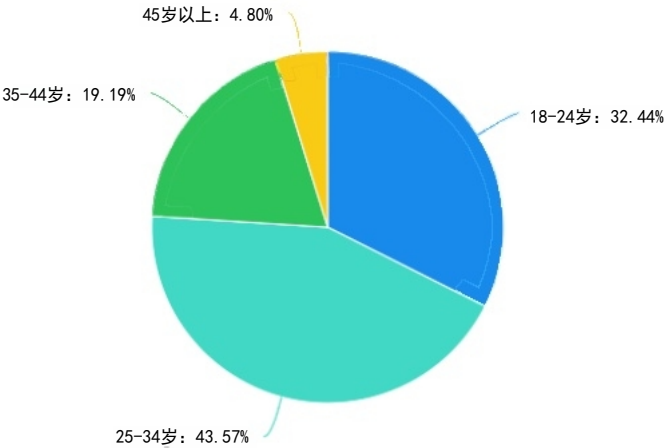

复制 下载 排序 尺寸: 三样式

3. Your occupation: cause

| Item              | frequency | percentage | accumulative perception |
|-------------------|-----------|------------|-------------------------|
| student           | 105       | 20. 15%    | 20. 15%                 |
| office worker     | 284       | 54. 51%    | 74. 66%                 |
| professional      | 104       | 19. 96%    | 94. 63%                 |
| Housewife/husband | 23        | 4. 41%     | 99. 04%                 |
| retire            | 2         | 0. 38%     | 99. 42%                 |
| other             | 3         | 0. 58%     | 100. 00%                |
| amount to         | 521       | 100. 0%    |                         |

|         |      |           |  |           |  |
|---------|------|-----------|--|-----------|--|
| ① Cakes | ring | Pyramidal |  | Giant bar |  |
|---------|------|-----------|--|-----------|--|

3. Your Occupation:

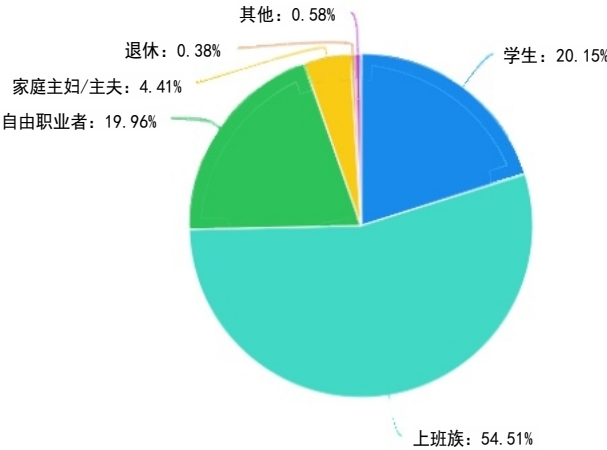

复 下 排

4.How much time do you spend on TikTok every day? [cause](#)

| Item                  | frequency | percentage | accumulative perception |
|-----------------------|-----------|------------|-------------------------|
| Less than 30 minutes  | 38        | 7.29%      | 7.29%                   |
| 30 minutes to an hour | 149       | 28.60%     | 35.89%                  |
| 1-2 hours             | 194       | 37.24%     | 73.13%                  |
| 2-3 hours             | 92        | 17.66%     | 90.79%                  |
| More than three hours | 48        | 9.21%      | 100.00%                 |
| amount to             | 521       | 100.0%     |                         |

Bread shape   C ring   Mountain pillar shape   Rectangular

4. How Much Time Do You Spend on TikTok Every Day?

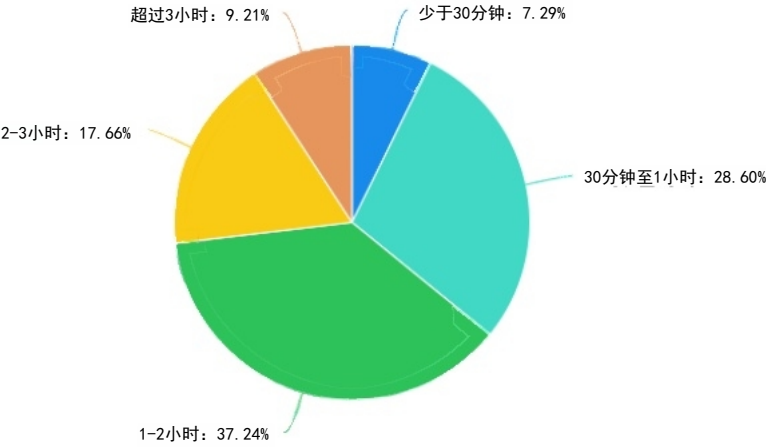

Relax [cause](#)

| Item       | frequency | percentage | accumulative perception |
|------------|-----------|------------|-------------------------|
| unselected | 166       | 31.86%     | 31.86%                  |
| pitch on   | 355       | 68.14%     | 100.00%                 |
| amount to  | 521       | 100.0%     |                         |

|         |        |                  |  |              |  |
|---------|--------|------------------|--|--------------|--|
| ① Cakes | C ring | Zapical columnar |  | Three shapes |  |
|---------|--------|------------------|--|--------------|--|

Relax

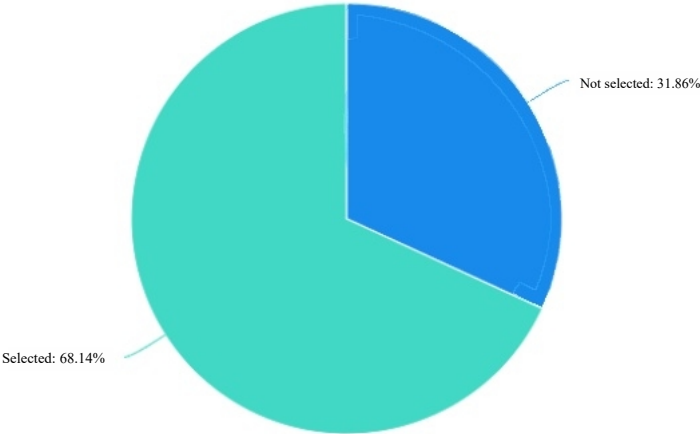

Learning new things by

| Item       | frequency | percentage | accumulative perception |
|------------|-----------|------------|-------------------------|
| unselected | 232       | 44.53%     | 44.53%                  |
| pitch on   | 289       | 55.47%     | 100.00%                 |
| amount to  | 521       | 100.0%     |                         |

学习新知识

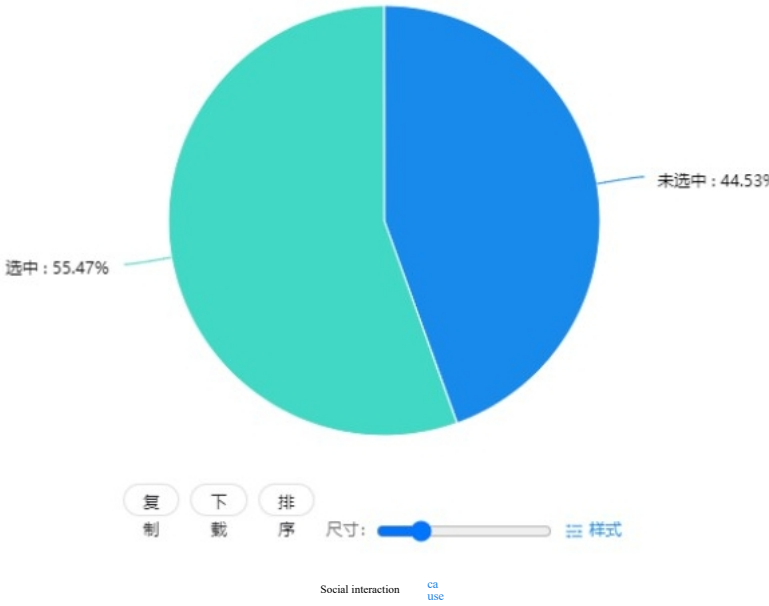

| Item       | frequency | percentage | accumulative perception |
|------------|-----------|------------|-------------------------|
| unselected | 239       | 45.87%     | 45.87%                  |
| pitch on   | 282       | 54.13%     | 100.00%                 |
| amount to  | 521       | 100.0%     |                         |

Social Interaction

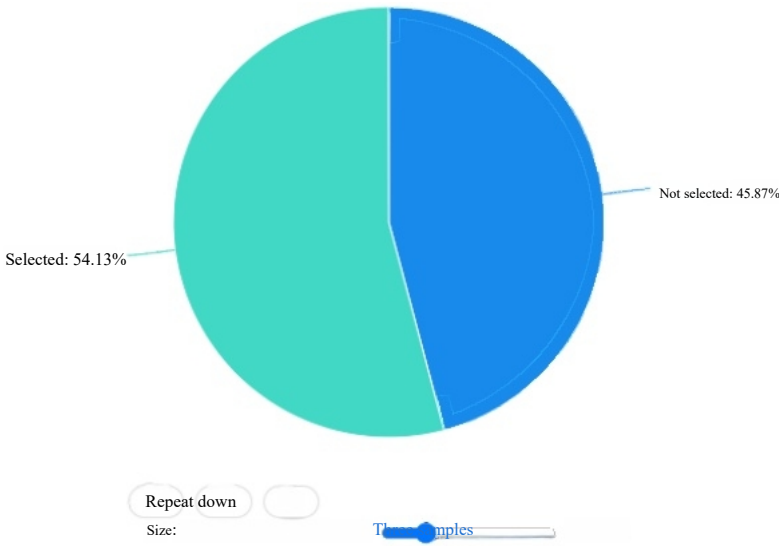

| Item       | frequency | percentage | accumulative perception |
|------------|-----------|------------|-------------------------|
| unselected | 335       | 64.30%     | 64.30%                  |
| pitch on   | 186       | 35.70%     | 100.00%                 |
| amount to  | 521       | 100.0%     |                         |

Follow the Trend

Selected: 35.70%

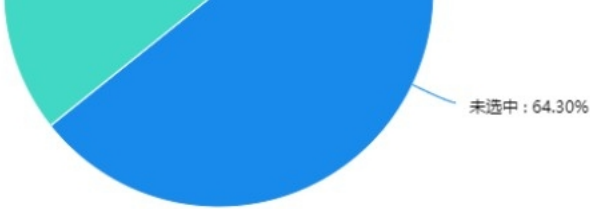

复制 下载 排序 尺寸: 样式

other

cau  
sc

| Item       | frequency | percentage | accumulative perception |
|------------|-----------|------------|-------------------------|
| unselected | 502       | 96.35%     | 96.35%                  |
| pitch on   | 19        | 3.65%      | 100.00%                 |
| amount to  | 521       | 100.0%     |                         |

|         |        |           |  |           |
|---------|--------|-----------|--|-----------|
| ① Cakes | C ring | Pyramidal |  | Giant bar |
|---------|--------|-----------|--|-----------|

Other

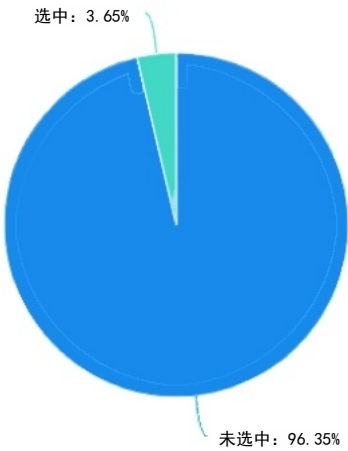

repeated 下 排 Size of the printed sequence: Three samples
